# Supplementary material for: Routine childhood vaccination rates in an academic family health team before and during the first wave of the COVID-19 pandemic: a pre–post analysis of a retrospective chart review
Source: PubMed Central journal article supplement — CMAJ Open. 2022 Jan 25;10(1):E43–9. doi: 10.9778/cmajo.20210084 (PMC8920592; doi:10.9778/cmajo.20210084), 2022-01-25
Supplement: 2021-0084-1-at.pdf [file 2021-0084-1-at.pdf]

## Appendix 1

Number of births in each month of the study. Number of vaccinations administered in each month, for each vaccination class.

| Month-Year | Number Births | Number DTaP-IPV-Hib | Number Pneu-C-13 | Number MMR | Number Men-C-C | Number Varicella | Total Number Vaccinations |
|------------|---------------|---------------------|------------------|------------|----------------|------------------|---------------------------|
| 18-Jan     | 16            | NA                  | NA               | NA         | NA             | NA               | 0                         |
| 18-Feb     | 14            | NA                  | NA               | NA         | NA             | NA               | 0                         |
| 18-Mar     | 13            | 13                  | 13               | 0          | 0              | 0                | 26                        |
| 18-Apr     | 20            | 13                  | 13               | 0          | 0              | 0                | 26                        |
| 18-May     | 14            | 25                  | 25               | 0          | 3              | 0                | 53                        |
| 18-Jun     | 16            | 28                  | 26               | 0          | 0              | 0                | 54                        |
| 18-Jul     | 13            | 38                  | 25               | 0          | 1              | 0                | 64                        |
| 18-Aug     | 14            | 47                  | 35               | 0          | 2              | 0                | 84                        |
| 18-Sep     | 16            | 31                  | 21               | 0          | 0              | 0                | 52                        |
| 18-Oct     | 20            | 49                  | 34               | 0          | 1              | 0                | 84                        |
| 18-Nov     | 12            | 45                  | 30               | 1          | 0              | 0                | 76                        |
| 18-Dec     | 12            | 45                  | 31               | 0          | 2              | 0                | 78                        |
| 19-Jan     | 16            | 37                  | 37               | 11         | 12             | 0                | 97                        |
| 19-Feb     | 12            | 51                  | 43               | 12         | 11             | 0                | 117                       |
| 19-Mar     | 13            | 43                  | 43               | 15         | 14             | 0                | 115                       |
| 19-Apr     | 12            | 41                  | 38               | 22         | 19             | 11               | 131                       |
| 19-May     | 13            | 48                  | 45               | 17         | 13             | 10               | 133                       |
| 19-Jun     | 16            | 37                  | 37               | 17         | 16             | 9                | 116                       |
| 19-Jul     | 12            | 48                  | 43               | 17         | 22             | 15               | 145                       |
| 19-Aug     | 25            | 43                  | 37               | 17         | 14             | 4                | 115                       |
| 19-Sep     | 23            | 54                  | 41               | 16         | 16             | 16               | 143                       |
| 19-Oct     | 19            | 67                  | 58               | 17         | 16             | 15               | 173                       |
| 19-Nov     | 13            | 53                  | 47               | 15         | 17             | 11               | 143                       |
| 19-Dec     | 10            | 62                  | 43               | 11         | 8              | 9                | 133                       |
| 20-Jan     | 15            | 75                  | 60               | 18         | 16             | 28               | 197                       |
| 20-Feb     | 19            | 60                  | 36               | 12         | 14             | 14               | 136                       |
| 20-Mar     | 16            | 52                  | 38               | 11         | 10             | 7                | 118                       |
| 20-Apr     | 22            | 59                  | 36               | 8          | 9              | 8                | 120                       |
| 20-May     | 21            | 52                  | 39               | 11         | 12             | 7                | 121                       |
| 20-Jun     | 15            | 64                  | 59               | 17         | 17             | 12               | 169                       |
| 20-Jul     | 18            | 69                  | 50               | 13         | 12             | 9                | 153                       |
| 20-Aug     | 16            | 62                  | 50               | 21         | 21             | 14               | 168                       |
| 20-Sep     | NA            | 76                  | 71               | 25         | 27             | 12               | 211                       |
| 20-Oct     | NA            | 65                  | 47               | 17         | 12             | 15               | 156                       |
| 20-Nov     | NA            | 50                  | 39               | 21         | 17             | 21               | 148                       |

Appendix 1, as supplied by the authors. Appendix to: Dong A, Meaney C, Sandhu G, et al. Routine childhood vaccination rates in an academic family health team before and during the first wave of the COVID-19 pandemic: a pre-post analysis of a retrospective chart review. *CMAJ Open* 2022. DOI:10.9778/cmajo.20210084. Copyright © 2022 The Author(s) or their employer(s). To receive this resource in an accessible format, please contact us at [cmajgroup@cmaj.ca](mailto:cmajgroup@cmaj.ca).

## Acronym Definitions

DTaP-IPV-Hib- Diphtheria, Tetanus, Pertussis, Polio, Haemophilus Influenzae Type B Vaccine (given at 2 months, 4 months, 6 months, and 18 months)

Pneu-C-13- Pneumococcal conjugate vaccine (given at 2 months, 4 months, and 12 months)

MMR- Measles, Mumps, and Rubella Vaccine (given at 12 months)

Men-C-C- Meningococcal Conjugate Vaccine (given at 12 months)

Varicella- Varicella Vaccine (given at 15 months)
