# Supplementary material for: Routine childhood vaccination rates in an academic family health team before and during the first wave of the COVID-19 pandemic: a pre–post analysis of a retrospective chart review
Source: PubMed Central journal article supplement — CMAJ Open. 2022 Jan 25;10(1):E43–9. doi: 10.9778/cmajo.20210084 (PMC8920592; doi:10.9778/cmajo.20210084), 2022-01-25
Supplement: open-2021-0084-original-submission.pdf [file open-2021-0084-original-submission.pdf]

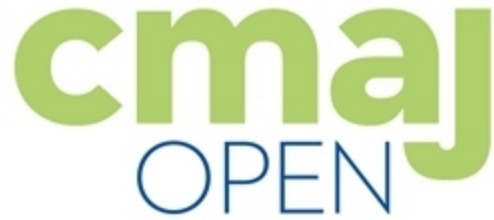

**The Impact of the COVID-19 Pandemic on Routine Childhood Vaccination Rates in an Academic Family Health Team.**

|                               |                                                                                                                                                                                                                                                                                                                                                                                                                                                                                                                                                                                                                                                                                                                                                                                                                     |
|-------------------------------|---------------------------------------------------------------------------------------------------------------------------------------------------------------------------------------------------------------------------------------------------------------------------------------------------------------------------------------------------------------------------------------------------------------------------------------------------------------------------------------------------------------------------------------------------------------------------------------------------------------------------------------------------------------------------------------------------------------------------------------------------------------------------------------------------------------------|
| Journal:                      | <i>CMAJ Open</i>                                                                                                                                                                                                                                                                                                                                                                                                                                                                                                                                                                                                                                                                                                                                                                                                    |
| Manuscript ID                 | CMAJOpen-2021-0084                                                                                                                                                                                                                                                                                                                                                                                                                                                                                                                                                                                                                                                                                                                                                                                                  |
| Manuscript Type:              | Cohort (retrospective)                                                                                                                                                                                                                                                                                                                                                                                                                                                                                                                                                                                                                                                                                                                                                                                              |
| Date Submitted by the Author: | 31-Mar-2021                                                                                                                                                                                                                                                                                                                                                                                                                                                                                                                                                                                                                                                                                                                                                                                                         |
| Complete List of Authors:     | Dong, Anson; Sinai Health System, Ray D Wolfe Department of Family Medicine; University of Toronto, Department of Family and Community Medicine<br>Sandhu, Gurbani; University of Toronto, Department of Family and Community Medicine; Sinai Health System, Ray D Wolfe Department of Family Medicine<br>Meaney, Christopher; University of Toronto, Famil and Community Medicine<br>De Oliveira, Nelia; Sinai Health System, Ray D Wolfe Department of Family Medicine<br>Singh, Suzanne; Sinai Health System, Ray D Wolfe Department of Family Medicine<br>Morson, Natalie; Sinai Health System, Ray D Wolfe Department of Family Medicine; University of Toronto, Department of Family and Community Medicine<br>Forte, Milena; Mount Sinai Hospital, Family Medicine                                           |
| More Detailed Keywords:       | Vaccination, Immunization, Child, COVID-19, Pandemic, Primary Care                                                                                                                                                                                                                                                                                                                                                                                                                                                                                                                                                                                                                                                                                                                                                  |
| Keywords:                     | Community medicine, Family medicine, general practice, primary care, Pediatrics, Public health, Infectious diseases                                                                                                                                                                                                                                                                                                                                                                                                                                                                                                                                                                                                                                                                                                 |
| Abstract:                     | <p><b>BACKGROUND</b><br/>There has been concern about the risk of declining routine vaccination rates during the COVID-19 pandemic. This study aimed to examine the impact of the COVID-19 pandemic on early childhood vaccination rates at a multi-site Academic Family Health Team (FHT).</p> <p><b>METHODS</b><br/>Vaccination records up to November 30, 2020 were collected for a cohort of children born between January 1, 2018 through August 31, 2020, from the FHT's electronic medical record (EMR). The proportion of children receiving timely, delayed, or no vaccination for 10 guideline-recommended childhood vaccines was estimated for the pre- and post-COVID-19 pandemic periods. Timeliness was determined based on vaccine recommended time intervals with a window of 28 days; vaccines</p> |

1  
2  
3  
4  
5  
6  
7  
8  
9  
10  
11  
12  
13  
14  
15  
16  
17  
18  
19  
20  
21  
22  
23  
24  
25  
26  
27  
28  
29  
30  
31  
32  
33  
34  
35  
36  
37  
38  
39  
40  
41  
42  
43  
44  
45  
46  
47  
48  
49  
50  
51  
52  
53  
54  
55  
56  
57  
58  
59  
60

|  |                                                                                                                                                                                                                                                                                                                                                                                                                                                                                                                                                                                                                                                                                                                                                                                                                                                                                                                         |
|--|-------------------------------------------------------------------------------------------------------------------------------------------------------------------------------------------------------------------------------------------------------------------------------------------------------------------------------------------------------------------------------------------------------------------------------------------------------------------------------------------------------------------------------------------------------------------------------------------------------------------------------------------------------------------------------------------------------------------------------------------------------------------------------------------------------------------------------------------------------------------------------------------------------------------------|
|  | <p>administered after this window were considered delayed. We estimated median time to vaccination for each vaccine and present cumulative incidence curves.</p> <p><b>RESULTS</b><br/>Most children were up to date with vaccinations (422 out of 506 (83.4%)). The rates were comparable in children under 12 months old in the pre- and post-COVID-19 pandemic periods. Lower rates of timely vaccinations seemed to be amplified during the pandemic. For children between 12- and 18-months cumulative incidence curves illustrate a mild pre- and post-COVID-19 differences.</p> <p><b>INTERPRETATION</b><br/>Our local findings suggest a modest deterioration in the uptake of routine childhood vaccines during the COVID-19 pandemic, in children between 12 and 18 months of age. Further study in Canada is needed to determine the true extent of the vaccination gap in children due to the pandemic.</p> |
|  |                                                                                                                                                                                                                                                                                                                                                                                                                                                                                                                                                                                                                                                                                                                                                                                                                                                                                                                         |

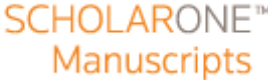

## Appendix 1: Ontario's Publicly Funded Immunization Schedules (19)

## Publicly Funded Immunization Schedules for Ontario – January 2021

Publicly funded vaccines may be provided only to eligible individuals and must be free of charge

| Routine Schedule: Children Starting Immunization in Infancy                             |     |          |          |          |                     |           |           |         |         |          |          |                         |                         |
|-----------------------------------------------------------------------------------------|-----|----------|----------|----------|---------------------|-----------|-----------|---------|---------|----------|----------|-------------------------|-------------------------|
| Vaccine                                                                                 | Age | 2 Months | 4 Months | 6 Months | 1 Year <sup>Ⓞ</sup> | 15 Months | 18 Months | 4 Years | Grade 7 | 14 Years | 24 Years | >34 Years <sup>*†</sup> | 65 Years                |
| DTaP-IPV-Hib<br>Diphtheria, Tetanus, Pertussis, Polio,<br>Haemophilus influenzae type b |     | ◆        | ◆        | ◆        |                     |           | ◆         |         |         |          |          |                         |                         |
| Pneu-C-13<br>Pneumococcal Conjugate 13                                                  |     | ◆        | ◆        |          | ◆                   |           |           |         |         |          |          |                         |                         |
| Rot-5<br>Rotavirus                                                                      |     | ▲        | ▲        | ▲        |                     |           |           |         |         |          |          |                         |                         |
| Men-C-C<br>Meningococcal Conjugate C                                                    |     |          |          |          | ◆                   |           |           |         |         |          |          |                         |                         |
| MMR<br>Measles, Mumps, Rubella                                                          |     |          |          |          | ■                   |           |           |         |         |          |          |                         |                         |
| Var<br>Varicella                                                                        |     |          |          |          |                     | ■         |           |         |         |          |          |                         |                         |
| MMRV<br>Measles, Mumps, Rubella, Varicella                                              |     |          |          |          |                     |           |           | ■       |         |          |          |                         |                         |
| Tdap-IPV<br>Tetanus, diphtheria, pertussis, Polio                                       |     |          |          |          |                     |           |           | ◆       |         |          |          |                         |                         |
| HB<br>Hepatitis B                                                                       |     |          |          |          |                     |           |           |         | ●       |          |          |                         |                         |
| Men-C-ACYW<br>Meningococcal Conjugate ACYW-135                                          |     |          |          |          |                     |           |           |         | ●       |          |          |                         |                         |
| HPV-9<br>Human Papillomavirus                                                           |     |          |          |          |                     |           |           |         | ●       |          |          |                         |                         |
| Tdap<br>Tetanus, diphtheria, pertussis                                                  |     |          |          |          |                     |           |           |         |         | ◆        | ◆        |                         |                         |
| Td (booster)<br>Tetanus, diphtheria                                                     |     |          |          |          |                     |           |           |         |         |          |          | ◆<br>Every 10<br>years  |                         |
| HZ<br>Herpes Zoster                                                                     |     |          |          |          |                     |           |           |         |         |          |          |                         | I                       |
| Pneu-P-23<br>Pneumococcal Polysaccharide 23                                             |     |          |          |          |                     |           |           |         |         |          |          |                         | ■                       |
| Inf<br>Influenza                                                                        |     |          |          |          |                     |           |           |         |         |          |          |                         | *Every year in the fall |

◆ - A single vaccine dose given by intramuscular injection  
 ■ - A single vaccine dose given by subcutaneous injection  
 ▲ - A single vaccine dose given by mouth  
 ● - Provided through school-based immunization programs. Men-C-ACYW is a single dose; HB is a 2 dose series (see Table 6); HPV-9 is a 2 dose series (see Table 10). Each vaccine dose is given by intramuscular injection  
 Ⓞ - Given no earlier than the 1<sup>st</sup> birthday, and prior to 16 months of age

\*† - Once a dose of Tdap is given in adulthood (24 years of age), adults should receive Td boosters every 10 years thereafter  
 I - HZ is a 2 dose series (see Table 12) given by intramuscular injection  
 \* - Children 6 months to 8 years of age who have not previously received a dose of influenza vaccine require 2 doses given 24 weeks apart. Children who have previously received ≥1 dose of influenza vaccine should receive 1 dose per season thereafter  
 Note: A different schedule and/or additional doses may be needed for high risk individuals (see Table 3) or if doses of a vaccine series are missed (see appropriate Tables 4-24)

## Appendix 2

Number of births in each month of the study. Number of vaccinations administered in each month, for each vaccination class.

| Month-Year | Number Births | Number DTaP-IPV-Hib | Number Pneu-C-13 | Number MMR | Number Men-C-C | Number Varicella | Total Number Vaccinations |
|------------|---------------|---------------------|------------------|------------|----------------|------------------|---------------------------|
| 18-Jan     | 16            | NA                  | NA               | NA         | NA             | NA               | 0                         |
| 18-Feb     | 14            | NA                  | NA               | NA         | NA             | NA               | 0                         |
| 18-Mar     | 13            | 13                  | 13               | 0          | 0              | 0                | 26                        |
| 18-Apr     | 20            | 13                  | 13               | 0          | 0              | 0                | 26                        |
| 18-May     | 14            | 25                  | 25               | 0          | 3              | 0                | 53                        |
| 18-Jun     | 16            | 28                  | 26               | 0          | 0              | 0                | 54                        |
| 18-Jul     | 13            | 38                  | 25               | 0          | 1              | 0                | 64                        |
| 18-Aug     | 14            | 47                  | 35               | 0          | 2              | 0                | 84                        |
| 18-Sep     | 16            | 31                  | 21               | 0          | 0              | 0                | 52                        |
| 18-Oct     | 20            | 49                  | 34               | 0          | 1              | 0                | 84                        |
| 18-Nov     | 12            | 45                  | 30               | 1          | 0              | 0                | 76                        |
| 18-Dec     | 12            | 45                  | 31               | 0          | 2              | 0                | 78                        |
| 19-Jan     | 16            | 37                  | 37               | 11         | 12             | 0                | 97                        |
| 19-Feb     | 12            | 51                  | 43               | 12         | 11             | 0                | 117                       |
| 19-Mar     | 13            | 43                  | 43               | 15         | 14             | 0                | 115                       |
| 19-Apr     | 12            | 41                  | 38               | 22         | 19             | 11               | 131                       |
| 19-May     | 13            | 48                  | 45               | 17         | 13             | 10               | 133                       |
| 19-Jun     | 16            | 37                  | 37               | 17         | 16             | 9                | 116                       |
| 19-Jul     | 12            | 48                  | 43               | 17         | 22             | 15               | 145                       |
| 19-Aug     | 25            | 43                  | 37               | 17         | 14             | 4                | 115                       |
| 19-Sep     | 23            | 54                  | 41               | 16         | 16             | 16               | 143                       |
| 19-Oct     | 19            | 67                  | 58               | 17         | 16             | 15               | 173                       |
| 19-Nov     | 13            | 53                  | 47               | 15         | 17             | 11               | 143                       |
| 19-Dec     | 10            | 62                  | 43               | 11         | 8              | 9                | 133                       |
| 20-Jan     | 15            | 75                  | 60               | 18         | 16             | 28               | 197                       |
| 20-Feb     | 19            | 60                  | 36               | 12         | 14             | 14               | 136                       |
| 20-Mar     | 16            | 52                  | 38               | 11         | 10             | 7                | 118                       |
| 20-Apr     | 22            | 59                  | 36               | 8          | 9              | 8                | 120                       |
| 20-May     | 21            | 52                  | 39               | 11         | 12             | 7                | 121                       |
| 20-Jun     | 15            | 64                  | 59               | 17         | 17             | 12               | 169                       |
| 20-Jul     | 18            | 69                  | 50               | 13         | 12             | 9                | 153                       |
| 20-Aug     | 16            | 62                  | 50               | 21         | 21             | 14               | 168                       |
| 20-Sep     | NA            | 76                  | 71               | 25         | 27             | 12               | 211                       |
| 20-Oct     | NA            | 65                  | 47               | 17         | 12             | 15               | 156                       |
| 20-Nov     | NA            | 50                  | 39               | 21         | 17             | 21               | 148                       |

Table 1: Number of vaccine-eligible patients in pre-vs-post COVID-19 groups based on age for selected childhood vaccinations

| Age   | Vaccination                                                                                | DOB Interval Pre                | DOB Interval Post                | N eligible pre | N eligible post | N ineligible |
|-------|--------------------------------------------------------------------------------------------|---------------------------------|----------------------------------|----------------|-----------------|--------------|
| 2mos  | <b>DTaP-IPV-Hib</b> (Diphtheria, Tetanus, Pertussis, Polio, Haemophilus influenzae type b) | (2018-Jan-01)-<br>(2020-Jan-17) | (2020-Jan-17)-<br>(2020-Aug-31)  | 375            | 131             | 0            |
|       | <b>Pneu-C-13</b> (Pneumococcal Conjugate 13)                                               | (2018-Jan-01)-<br>(2020-Jan-17) | (2020-Jan-17)-<br>(2020-Aug-31)  | 375            | 131             | 0            |
| 4mos  | <b>DTaP-IPV-Hib</b> (Diphtheria, Tetanus, Pertussis, Polio, Haemophilus influenzae type b) | (2018-Jan-01)-<br>(2019-Nov-17) | (2019-Nov-17)-<br>(2020-June-30) | 348            | 124             | 34           |
|       | <b>Pneu-C-13</b> (Pneumococcal Conjugate 13)                                               | (2018-Jan-01)-<br>(2019-Nov-17) | (2019-Nov-17)-<br>(2020-June-30) | 348            | 124             | 34           |
| 6mos  | <b>DTaP-IPV-Hib</b> (Diphtheria, Tetanus, Pertussis, Polio, Haemophilus influenzae type b) | (2018-Jan-01)-<br>(2019-Sep-17) | (2019-Sep-17)-<br>(2020-Apr-30)  | 315            | 121             | 70           |
| 12mos | <b>MMR</b> (Measles, Mumps, Rubella)                                                       | (2018-Jan-01)-<br>(2019-Mar-17) | (2019-Mar-17)-<br>(2019-Oct-31)  | 214            | 127             | 165          |
|       | <b>Pneu-C-13</b> (Pneumococcal Conjugate 13)                                               | (2018-Jan-01)-<br>(2019-Mar-17) | (2019-Mar-17)-<br>(2019-Oct-31)  | 214            | 127             | 165          |
|       | <b>Men-C-C</b> (Meningococcal Conjugate C)                                                 | (2018-Jan-01)-<br>(2019-Mar-17) | (2019-Mar-17)-<br>(2019-Oct-31)  | 214            | 127             | 165          |
| 15mos | <b>Var</b> (Varicella)                                                                     | (2018-Jan-01)-<br>(2018-Dec-17) | (2018-Dec-17)-<br>(2019-Jul-31)  | 175            | 99              | 232          |
| 18mos | <b>DTaP-IPV-Hib</b> (Diphtheria, Tetanus, Pertussis, Polio, Haemophilus influenzae type b) | (2018-Jan-01)-<br>(2018-Sep-17) | (2018-Sep-17)-<br>(2019-Apr-31)  | 129            | 104             | 273          |

Table 2: Percentage of patients receiving timely, delayed, and no immunization pre-vs-post COVID-19. 95% confidence intervals are displayed for each estimated percentage. Fisher's exact test is used to assess changes in vaccination uptake pre-vs-post COVID-19.

|                                                                                                    | Pre COVID-19                           |                                         |                                    | Post COVID-19                          |                                         |                                    | Fisher Exact Test P-Value |
|----------------------------------------------------------------------------------------------------|----------------------------------------|-----------------------------------------|------------------------------------|----------------------------------------|-----------------------------------------|------------------------------------|---------------------------|
|                                                                                                    | Percentage Vaccinated On-Time (95% CI) | Percentage Delayed Vaccination (95% CI) | Percentage Not Vaccinated (95% CI) | Percentage Vaccinated On-Time (95% CI) | Percentage Delayed Vaccination (95% CI) | Percentage Not Vaccinated (95% CI) |                           |
| <b>2mos DTaP-IPV-Hib</b><br>(Diphtheria, Tetanus, Pertussis, Polio, Haemophilus influenzae type b) | 94.67<br>(91.88 - 96.71)               | 3.73<br>(2.06 - 6.18)                   | 1.60<br>(0.59 - 3.45)              | 94.66<br>(89.30 - 97.82)               | 4.58<br>(1.70 - 9.70)                   | 0.76<br>(0.02 - 4.18)              | 0.7586                    |
| <b>2mos Pneu-C-13</b><br>(Pneumococcal Conjugate 13)                                               | 93.6<br>(90.63 - 95.86)                | 3.73<br>(2.06 - 6.18)                   | 2.67<br>(1.29 - 4.85)              | 94.66<br>(89.30 - 97.82)               | 4.58<br>(1.70 - 9.70)                   | 0.76<br>(0.02 - 4.18)              | 0.4511                    |
| <b>4mos DTaP-IPV-Hib</b><br>(Diphtheria, Tetanus, Pertussis, Polio, Haemophilus influenzae type b) | 90.80<br>(87.27 - 93.63)               | 5.75<br>(3.55 - 8.74)                   | 3.45<br>(1.79 - 5.95)              | 94.35<br>(88.71 - 97.70)               | 3.23<br>(0.89 - 8.05)                   | 2.42<br>(0.50 - 6.91)              | 0.5374                    |
| <b>4mos Pneu-C-13</b><br>(Pneumococcal Conjugate 13)                                               | 91.09<br>(87.59 - 93.87)               | 5.46<br>(3.32 - 8.40)                   | 3.45<br>(1.79 - 5.95)              | 92.74<br>(86.67 - 96.63)               | 4.03<br>(1.32 - 9.16)                   | 3.23<br>(0.89 - 8.05)              | 0.9180                    |
| <b>6mos DTaP-IPV-Hib</b><br>(Diphtheria, Tetanus, Pertussis, Polio, Haemophilus influenzae type b) | 88.89<br>(84.89 - 92.14)               | 6.03<br>(3.67 - 9.26)                   | 5.08<br>(2.93 - 8.12)              | 81.82<br>(73.78 - 88.24)               | 9.09<br>(4.63 - 15.68)                  | 9.09<br>(4.63 - 15.68)             | 0.1272                    |
| <b>12mos MMR</b><br>(Measles, Mumps, Rubella)                                                      | 81.31<br>(75.43 - 86.30)               | 12.62<br>(8.48 - 17.82)                 | 6.07<br>(3.27 - 10.16)             | 69.29<br>(60.49 - 77.17)               | 18.90<br>(12.50 - 26.80)                | 11.81<br>(6.76 - 18.73)            | 0.0321                    |
| <b>12mos Pneu-C-13</b><br>(Pneumococcal Conjugate 13)                                              | 79.44<br>(73.40 - 84.65)               | 10.75<br>(6.94 - 15.69)                 | 9.81<br>(6.18 - 14.61)             | 68.50<br>(59.67 - 76.45)               | 18.90<br>(12.50 - 26.80)                | 12.60<br>(7.38 - 19.65)            | 0.0589                    |
| <b>12mos Men-C-C</b><br>(Meningococcal Conjugate C)                                                | 80.84<br>(74.92 - 85.89)               | 13.55<br>(9.27 - 18.88)                 | 5.61<br>(2.93 - 9.59)              | 66.14<br>(57.21 - 74.30)               | 20.47<br>(13.83 - 28.54)                | 13.39<br>(8.00 - 20.56)            | 0.0063                    |
| <b>15mos Var</b><br>(Varicella)                                                                    | 64.00<br>(56.41 - 71.10)               | 24.57<br>(18.39 - 31.64)                | 11.43<br>(7.12 - 17.10)            | 52.53<br>(42.24 - 62.66)               | 24.24<br>(16.19 - 33.89)                | 23.23<br>(15.33 - 32.79)           | 0.0324                    |

1  
2  
3  
4  
5  
6  
7  
8  
9  
10  
11  
12  
13  
14  
15  
16  
17  
18  
19  
20  
21  
22  
23  
24  
25  
26  
27  
28  
29  
30  
31  
32  
33  
34  
35  
36  
37  
38  
39  
40  
41  
42  
43  
44  
45  
46  
47  
48  
49  
50  
51  
52  
53  
54  
55  
56  
57  
58  
59  
60

|                                                                                                     |                          |                          |                         |                          |                          |                          |        |
|-----------------------------------------------------------------------------------------------------|--------------------------|--------------------------|-------------------------|--------------------------|--------------------------|--------------------------|--------|
| <b>18mos DTaP-IPV-Hib</b><br>(Diphtheria, Tetanus, Pertussis, Polio, Haemophilus influenzae type b) | 66.67<br>(57.83 - 74.72) | 17.83<br>(11.65 - 25.54) | 15.50<br>(9.73 - 22.92) | 58.65<br>(48.58 - 68.23) | 24.04<br>(16.20 - 33.41) | 17.31<br>(10.59 - 25.97) | 0.4195 |
|-----------------------------------------------------------------------------------------------------|--------------------------|--------------------------|-------------------------|--------------------------|--------------------------|--------------------------|--------|

Confidential

**The RECORD statement – checklist of items, extended from the STROBE statement, that should be reported in observational studies using routinely collected health data.**

|                           | Item No. | STROBE items                                                                                                                                                                               | Location in manuscript where items are reported | RECORD items                                                                                                                                                                                                                                                                                                                                                                                                                                | Location in manuscript where items are reported |
|---------------------------|----------|--------------------------------------------------------------------------------------------------------------------------------------------------------------------------------------------|-------------------------------------------------|---------------------------------------------------------------------------------------------------------------------------------------------------------------------------------------------------------------------------------------------------------------------------------------------------------------------------------------------------------------------------------------------------------------------------------------------|-------------------------------------------------|
| <b>Title and abstract</b> |          |                                                                                                                                                                                            |                                                 |                                                                                                                                                                                                                                                                                                                                                                                                                                             |                                                 |
|                           | 1        | (a) Indicate the study's design with a commonly used term in the title or the abstract (b) Provide in the abstract an informative and balanced summary of what was done and what was found | 3                                               | RECORD 1.1: The type of data used should be specified in the title or abstract. When possible, the name of the databases used should be included.<br><br>RECORD 1.2: If applicable, the geographic region and timeframe within which the study took place should be reported in the title or abstract.<br><br>RECORD 1.3: If linkage between databases was conducted for the study, this should be clearly stated in the title or abstract. | 1<br><br><br>1                                  |
| <b>Introduction</b>       |          |                                                                                                                                                                                            |                                                 |                                                                                                                                                                                                                                                                                                                                                                                                                                             |                                                 |
| Background rationale      | 2        | Explain the scientific background and rationale for the investigation being reported                                                                                                       | 4                                               |                                                                                                                                                                                                                                                                                                                                                                                                                                             |                                                 |
| Objectives                | 3        | State specific objectives, including any prespecified hypotheses                                                                                                                           | 4                                               |                                                                                                                                                                                                                                                                                                                                                                                                                                             |                                                 |
| <b>Methods</b>            |          |                                                                                                                                                                                            |                                                 |                                                                                                                                                                                                                                                                                                                                                                                                                                             |                                                 |
| Study Design              | 4        | Present key elements of study design early in the paper                                                                                                                                    | 5                                               |                                                                                                                                                                                                                                                                                                                                                                                                                                             |                                                 |
| Setting                   | 5        | Describe the setting, locations, and relevant dates, including periods of recruitment, exposure, follow-up, and data collection                                                            | 5                                               |                                                                                                                                                                                                                                                                                                                                                                                                                                             |                                                 |



|                              |   |                                                                                                                                                                                                                                                                                                                                                                                                                                                                                                                                                                                                                                                                                                                              |     |                                                                                                                                                                                                                                                                                                                                                                                                                                                                                                                                                                                                                                                                                                      |     |
|------------------------------|---|------------------------------------------------------------------------------------------------------------------------------------------------------------------------------------------------------------------------------------------------------------------------------------------------------------------------------------------------------------------------------------------------------------------------------------------------------------------------------------------------------------------------------------------------------------------------------------------------------------------------------------------------------------------------------------------------------------------------------|-----|------------------------------------------------------------------------------------------------------------------------------------------------------------------------------------------------------------------------------------------------------------------------------------------------------------------------------------------------------------------------------------------------------------------------------------------------------------------------------------------------------------------------------------------------------------------------------------------------------------------------------------------------------------------------------------------------------|-----|
| Participants                 | 6 | <p>(a) <i>Cohort study</i> - Give the eligibility criteria, and the sources and methods of selection of participants. Describe methods of follow-up</p> <p><i>Case-control study</i> - Give the eligibility criteria, and the sources and methods of case ascertainment and control selection. Give the rationale for the choice of cases and controls</p> <p><i>Cross-sectional study</i> - Give the eligibility criteria, and the sources and methods of selection of participants</p> <p>(b) <i>Cohort study</i> - For matched studies, give matching criteria and number of exposed and unexposed</p> <p><i>Case-control study</i> - For matched studies, give matching criteria and the number of controls per case</p> | 5   | <p>RECORD 6.1: The methods of study population selection (such as codes or algorithms used to identify subjects) should be listed in detail. If this is not possible, an explanation should be provided.</p> <p>RECORD 6.2: Any validation studies of the codes or algorithms used to select the population should be referenced. If validation was conducted for this study and not published elsewhere, detailed methods and results should be provided.</p> <p>RECORD 6.3: If the study involved linkage of databases, consider use of a flow diagram or other graphical display to demonstrate the data linkage process, including the number of individuals with linked data at each stage.</p> | 5-6 |
| Variables                    | 7 | Clearly define all outcomes, exposures, predictors, potential confounders, and effect modifiers. Give diagnostic criteria, if applicable.                                                                                                                                                                                                                                                                                                                                                                                                                                                                                                                                                                                    | 6   | RECORD 7.1: A complete list of codes and algorithms used to classify exposures, outcomes, confounders, and effect modifiers should be provided. If these cannot be reported, an explanation should be provided.                                                                                                                                                                                                                                                                                                                                                                                                                                                                                      | N/A |
| Data sources/<br>measurement | 8 | For each variable of interest, give sources of data and details of methods of assessment (measurement). Describe comparability of assessment methods if there is more than one group                                                                                                                                                                                                                                                                                                                                                                                                                                                                                                                                         | 5-8 |                                                                                                                                                                                                                                                                                                                                                                                                                                                                                                                                                                                                                                                                                                      |     |

|                                                                                                                                              |                                  |    |                                                                                                                                                                                                                                                                                                                                                                                                                                                                                                                                                                      |     |                                                                                                                                                       |   |
|----------------------------------------------------------------------------------------------------------------------------------------------|----------------------------------|----|----------------------------------------------------------------------------------------------------------------------------------------------------------------------------------------------------------------------------------------------------------------------------------------------------------------------------------------------------------------------------------------------------------------------------------------------------------------------------------------------------------------------------------------------------------------------|-----|-------------------------------------------------------------------------------------------------------------------------------------------------------|---|
| 1<br>2<br>3<br>4<br>5<br>6<br>7<br>8<br>9<br>10                                                                                              | Bias                             | 9  | Describe any efforts to address potential sources of bias                                                                                                                                                                                                                                                                                                                                                                                                                                                                                                            | 5   |                                                                                                                                                       |   |
| 11<br>12<br>13<br>14<br>15<br>16<br>17<br>18<br>19<br>20<br>21<br>22<br>23<br>24<br>25<br>26<br>27<br>28<br>29<br>30<br>31<br>32<br>33<br>34 | Study size                       | 10 | Explain how the study size was arrived at                                                                                                                                                                                                                                                                                                                                                                                                                                                                                                                            | 5-6 |                                                                                                                                                       |   |
| 35<br>36<br>37<br>38<br>39<br>40<br>41<br>42<br>43<br>44<br>45<br>46<br>47                                                                   | Quantitative variables           | 11 | Explain how quantitative variables were handled in the analyses. If applicable, describe which groupings were chosen, and why                                                                                                                                                                                                                                                                                                                                                                                                                                        | 7-8 |                                                                                                                                                       |   |
|                                                                                                                                              | Statistical methods              | 12 | (a) Describe all statistical methods, including those used to control for confounding<br>(b) Describe any methods used to examine subgroups and interactions<br>(c) Explain how missing data were addressed<br>(d) <i>Cohort study</i> - If applicable, explain how loss to follow-up was addressed<br><i>Case-control study</i> - If applicable, explain how matching of cases and controls was addressed<br><i>Cross-sectional study</i> - If applicable, describe analytical methods taking account of sampling strategy<br>(e) Describe any sensitivity analyses | 7-8 |                                                                                                                                                       |   |
|                                                                                                                                              | Data access and cleaning methods |    | ..                                                                                                                                                                                                                                                                                                                                                                                                                                                                                                                                                                   |     | RECORD 12.1: Authors should describe the extent to which the investigators had access to the database population used to create the study population. | 5 |

|                  |    |                                                                                                                                                                                                                                                                                                                                                 |      |                                                                                                                                                                                                                                                                                                                    |   |
|------------------|----|-------------------------------------------------------------------------------------------------------------------------------------------------------------------------------------------------------------------------------------------------------------------------------------------------------------------------------------------------|------|--------------------------------------------------------------------------------------------------------------------------------------------------------------------------------------------------------------------------------------------------------------------------------------------------------------------|---|
|                  |    |                                                                                                                                                                                                                                                                                                                                                 |      | RECORD 12.2: Authors should provide information on the data cleaning methods used in the study.                                                                                                                                                                                                                    | 6 |
| Linkage          |    | ..                                                                                                                                                                                                                                                                                                                                              |      | RECORD 12.3: State whether the study included person-level, institutional-level, or other data linkage across two or more databases. The methods of linkage and methods of linkage quality evaluation should be provided.                                                                                          | 6 |
| <b>Results</b>   |    |                                                                                                                                                                                                                                                                                                                                                 |      |                                                                                                                                                                                                                                                                                                                    |   |
| Participants     | 13 | (a) Report the numbers of individuals at each stage of the study ( <i>e.g.</i> , numbers potentially eligible, examined for eligibility, confirmed eligible, included in the study, completing follow-up, and analysed)<br>(b) Give reasons for non-participation at each stage.<br>(c) Consider use of a flow diagram                          | 7    | RECORD 13.1: Describe in detail the selection of the persons included in the study ( <i>i.e.</i> , study population selection) including filtering based on data quality, data availability and linkage. The selection of included persons can be described in the text and/or by means of the study flow diagram. | 5 |
| Descriptive data | 14 | (a) Give characteristics of study participants ( <i>e.g.</i> , demographic, clinical, social) and information on exposures and potential confounders<br>(b) Indicate the number of participants with missing data for each variable of interest<br>(c) <i>Cohort study</i> - summarise follow-up time ( <i>e.g.</i> , average and total amount) | 9-10 |                                                                                                                                                                                                                                                                                                                    |   |
| Outcome data     | 15 | <i>Cohort study</i> - Report numbers of outcome events or summary measures over time<br><i>Case-control study</i> - Report numbers in each exposure                                                                                                                                                                                             | 9-10 |                                                                                                                                                                                                                                                                                                                    |   |

|                   |    |                                                                                                                                                                                                                                                                                                                                                                                                                 |       |                                                                                                                                                                                                                                                                                                          |       |
|-------------------|----|-----------------------------------------------------------------------------------------------------------------------------------------------------------------------------------------------------------------------------------------------------------------------------------------------------------------------------------------------------------------------------------------------------------------|-------|----------------------------------------------------------------------------------------------------------------------------------------------------------------------------------------------------------------------------------------------------------------------------------------------------------|-------|
|                   |    | category, or summary measures of exposure<br><i>Cross-sectional study</i> - Report numbers of outcome events or summary measures                                                                                                                                                                                                                                                                                |       |                                                                                                                                                                                                                                                                                                          |       |
| Main results      | 16 | (a) Give unadjusted estimates and, if applicable, confounder-adjusted estimates and their precision (e.g., 95% confidence interval). Make clear which confounders were adjusted for and why they were included<br>(b) Report category boundaries when continuous variables were categorized<br>(c) If relevant, consider translating estimates of relative risk into absolute risk for a meaningful time period | 11-12 |                                                                                                                                                                                                                                                                                                          |       |
| Other analyses    | 17 | Report other analyses done— e.g., analyses of subgroups and interactions, and sensitivity analyses                                                                                                                                                                                                                                                                                                              | 13    |                                                                                                                                                                                                                                                                                                          |       |
| <b>Discussion</b> |    |                                                                                                                                                                                                                                                                                                                                                                                                                 |       |                                                                                                                                                                                                                                                                                                          |       |
| Key results       | 18 | Summarise key results with reference to study objectives                                                                                                                                                                                                                                                                                                                                                        | 9     |                                                                                                                                                                                                                                                                                                          |       |
| Limitations       | 19 | Discuss limitations of the study, taking into account sources of potential bias or imprecision. Discuss both direction and magnitude of any potential bias                                                                                                                                                                                                                                                      | 16    | RECORD 19.1: Discuss the implications of using data that were not created or collected to answer the specific research question(s). Include discussion of misclassification bias, unmeasured confounding, missing data, and changing eligibility over time, as they pertain to the study being reported. | 14-17 |
| Interpretation    | 20 | Give a cautious overall interpretation of results considering objectives,                                                                                                                                                                                                                                                                                                                                       | 14-17 |                                                                                                                                                                                                                                                                                                          |       |

|                                                           |    |                                                                                                                                                               |    |                                                                                                                                                          |     |
|-----------------------------------------------------------|----|---------------------------------------------------------------------------------------------------------------------------------------------------------------|----|----------------------------------------------------------------------------------------------------------------------------------------------------------|-----|
|                                                           |    | limitations, multiplicity of analyses, results from similar studies, and other relevant evidence                                                              |    |                                                                                                                                                          |     |
| Generalisability                                          | 21 | Discuss the generalisability (external validity) of the study results                                                                                         | 17 |                                                                                                                                                          |     |
| <b>Other Information</b>                                  |    |                                                                                                                                                               |    |                                                                                                                                                          |     |
| Funding                                                   | 22 | Give the source of funding and the role of the funders for the present study and, if applicable, for the original study on which the present article is based | 19 |                                                                                                                                                          |     |
| Accessibility of protocol, raw data, and programming code |    | ..                                                                                                                                                            |    | RECORD 22.1: Authors should provide information on how to access any supplemental information such as the study protocol, raw data, or programming code. | N/A |

\*Reference: Benchimol EI, Smeeth L, Guttman A, Harron K, Moher D, Petersen I, Sørensen HT, von Elm E, Langan SM, the RECORD Working Committee. The REporting of studies Conducted using Observational Routinely-collected health Data (RECORD) Statement. *PLoS Medicine* 2015; in press.

\*Checklist is protected under Creative Commons Attribution ([CC BY](https://creativecommons.org/licenses/by/4.0/)) license.

1  
2  
3  
4  
5  
6  
7  
8  
9  
10  
11  
12  
13  
14  
15  
16  
17  
18  
19  
20  
21  
22  
23  
24  
25  
26  
27  
28  
29  
30  
31  
32  
33  
34  
35  
36  
37  
38  
39  
40  
41  
42  
43  
44  
45  
46  
47  
48  
49  
50  
51  
52  
53  
54  
55  
56  
57  
58  
59  
60

TITLE: The Impact of the COVID-19 Pandemic on Routine Childhood Vaccination Rates in an Academic Family Health Team.

KEYWORDS: Vaccination, immunization, child, COVID-19, pandemic, primary care

Confidential

## AUTHOR LIST:

Name, Degrees, Affiliation(s)

Anson Dong, MD, MBA, Mount Sinai Academic Family Health Team, Ray D Wolfe Department of Family Medicine, Sinai Health, Family Medicine Resident, Department of Family and Community Medicine, University of Toronto

Gurbani Sandhu, MD, Mount Sinai Academic Family Health Team, Ray D Wolfe Department of Family Medicine, Sinai Health, Family Medicine Resident, Department of Family and Community Medicine, University of Toronto

Christopher Meaney, MSc, Department of Family and Community Medicine, University of Toronto

Nelia De Oliveira, Mount Sinai Academic Family Health Team, Ray D Wolfe Department of Family Medicine, Sinai Health

Suzanne Singh, BScPhm, PharmD, Mount Sinai Academic Family Health Team, Ray D Wolfe Department of Family Medicine, Sinai Health, Department of Family and Community Medicine, University of Toronto

Natalie Morson, MD CCFP, MScCH, Mount Sinai Academic Family Health Team, Ray D Wolfe Department of Family Medicine, Sinai Health, Lecturer, Department of Family and Community Medicine, University of Toronto

Milena Forte, MD CCFP, Mount Sinai Academic Family Health Team, Ray D Wolfe Department of Family Medicine, Sinai Health, Assistant Professor, Maternity Care Lead, Department of Family and Community Medicine, University of Toronto

1  
2  
3 ABSTRACT (250 words)  
4

5 BACKGROUND  
6

7 There has been concern about the risk of declining routine vaccination rates during the COVID-19  
8 pandemic. This study aimed to examine the impact of the COVID-19 pandemic on early childhood  
9 vaccination rates at a multi-site Academic Family Health Team (FHT).  
10  
11  
12

13  
14 METHODS  
15

16 Vaccination records up to November 30, 2020 were collected for a cohort of children born between  
17 January 1, 2018 through August 31, 2020, from the FHT's electronic medical record (EMR). The  
18 proportion of children receiving timely, delayed, or no vaccination for 10 guideline-recommended  
19 childhood vaccines was estimated for the pre- and post-COVID-19 pandemic periods. Timeliness was  
20 determined based on vaccine recommended time intervals with a window of 28 days; vaccines  
21 administered after this window were considered delayed. We estimated median time to vaccination for  
22 each vaccine and present cumulative incidence curves.  
23  
24  
25  
26  
27  
28  
29  
30

31  
32 RESULTS  
33

34 Most children were up to date with vaccinations (422 out of 506 (83.4%)). The rates were comparable in  
35 children under 12 months old in the pre- and post-COVID-19 pandemic periods. Lower rates of timely  
36 vaccinations seemed to be amplified during the pandemic. For children between 12- and 18-months  
37 cumulative incidence curves illustrate a mild pre- and post-COVID-19 differences.  
38  
39  
40  
41  
42

43  
44 INTERPRETATION  
45

46 Our local findings suggest a modest deterioration in the uptake of routine childhood vaccines during the  
47 COVID-19 pandemic, in children between 12 and 18 months of age. Further study in Canada is needed  
48 to determine the true extent of the vaccination gap in children due to the pandemic.  
49  
50  
51  
52  
53  
54  
55  
56  
57  
58  
59  
60



## INTRODUCTION

Childhood vaccination programs are a critical public health intervention that have virtually eliminated previously common and usually fatal infectious diseases (1). In Canada, vaccination programs exist in various forms in each province and territory. In Ontario, publicly funded vaccinations begin at two months of age (see appendix 1) and are largely delivered by family physicians and general pediatricians.

On March 17, 2020, the Ontario government declared a public emergency under the province's Emergency Management and Civil Protection Act in response to the COVID-19 pandemic. The province faced two key issues: the uncertainty of the supply of personal protective equipment (PPE) for healthcare workers and an acute-care system already facing capacity issues (2). In the early response to the pandemic, part of the efforts to combat these challenges revolved around a coordinated public campaign urging citizens to stay home except for essential services.

Furthermore, available billing data from Ontario suggested that there was a dramatic decrease in overall patient visits since the emergence of the COVID-19 pandemic (3). While family physicians continued to see more patients than specialists overall in February and March, family physician total visit volumes in Ontario were still 15% lower in June 2020 compared to June 2019 inclusive of virtual and in-person visits. Given reports of reduced vaccinations from other jurisdictions (4,5), an important question is whether these observed volume decreases have affected routine childhood vaccinations in Ontario.

The objective of this study was to examine the impact of the COVID-19 pandemic environment on vaccine uptake rates in early childhood at a multi-site Family Health Team (FHT), with an urban academic center in downtown Toronto and a suburban community site in Vaughan, Ontario. We investigated the percentage of patients receiving timely, delayed, or no vaccinations, pre-vs-post the start of the COVID-19 pandemic. We also examined time to routine vaccination both pre- and post-the start of the COVID-19 pandemic.

## METHODS

### STUDY SETTING AND PARTICIPANTS

Our FHT combines the expertise and services of an interprofessional team to provide preventive and acute care throughout the age spectrum (pediatric, adult and geriatric) as well as full spectrum maternity care (including individual and group prenatal, birth and postpartum care), and is affiliated with a large teaching hospital. Our downtown academic primary care team serves a population of approximately 12,000 patients and includes family physicians, family medicine residents, nurses and other interprofessional health care providers. Our growing community site in Vaughan serves approximately 10,000 patients and is composed of a similar interprofessional team, without trainees. Our FHT maintained our usual hours of operation throughout the pandemic, offering both virtual and in-person appointments in large part due to support provided by our affiliated hospital. Of note, we prioritized and had the capacity to offer uninterrupted routine childhood vaccinations administered by physician and nursing staff, with clinic staff having access to adequate PPE, infection control and prevention resources, and physical distancing in the clinic space.

Our patient population of interest were children less than 2 years of age. Study participants included all patients born between January 1, 2018 through August 31, 2020 (i.e. 2mos + 28d from study endpoint, ensuring all patients could be included in a least one comparison). Vaccination data was collected up until November 30, 2020.

### DATA SOURCES

We extracted information regarding patient demographics and timing of routine childhood vaccinations from the FHT's electronic medical record (EMR). Demographic information reported includes date of birth (DOB) and sex (M/F). Information regarding administration and timing of early childhood vaccinations was

1  
2  
3 initially extracted via the chart review function from the EMR's database of comprehensive patient  
4 profiles (CPP) within individual health records. For any charts with incomplete vaccination records or no  
5 vaccinations recorded, we undertook a secondary manual chart review to identify if the vaccination had  
6  
7 in fact been given but incorrectly documented outside of the CPP.  
8  
9  
10  
11  
12  
13

#### 14 OUTCOME MEASURES

15  
16 We estimated pre-post COVID-19 differences in the proportion of patients receiving 1) timely  
17 administration (within 28 days of indicated age), 2) delayed administration (more than 28 days after  
18 indicated age), or 3) no immunization for 10 guideline-recommended early childhood vaccinations. We  
19 excluded rotavirus vaccination as an outcome measure due to the added complexity in data reporting  
20 resulting from two rotavirus vaccine options available in Ontario, each with differing administration  
21 schedules. In this study, the COVID-19 intervention date was assumed to be March 17, 2020 - the date  
22 when the province of Ontario declared the COVID-19 pandemic an emergency. Depending on the timing  
23 of patient DOB relative to the COVID-19 intervention date, patients were assigned to the pre-COVID-19  
24 group, post-COVID-19 group, or declared ineligible for the comparison if during the study period they  
25 were not old enough for the specified vaccination. Table 1 below specifies each of the 10 vaccinations  
26 under consideration in this study, their recommended timing of administration, and the associated date  
27 of birth intervals for eligibility for the pre-post comparison.  
28  
29  
30  
31  
32  
33  
34  
35  
36  
37  
38  
39  
40  
41  
42  
43  
44  
45  
46  
47  
48  
49  
50  
51  
52  
53  
54  
55  
56  
57  
58  
59  
60

Table 1: Number of vaccine-eligible patients in pre-vs-post COVID-19 groups based on age for selected childhood vaccinations

| Age   | Vaccination                                                                                | DOB Interval Pre                | DOB Interval Post                | N eligible pre | N eligible post | N ineligible |
|-------|--------------------------------------------------------------------------------------------|---------------------------------|----------------------------------|----------------|-----------------|--------------|
| 2mos  | <b>DTaP-IPV-Hib</b> (Diphtheria, Tetanus, Pertussis, Polio, Haemophilus influenzae type b) | (2018-Jan-01)-<br>(2020-Jan-17) | (2020-Jan-17)-<br>(2020-Aug-31)  | 375            | 131             | 0            |
|       | <b>Pneu-C-13</b> (Pneumococcal Conjugate 13)                                               | (2018-Jan-01)-<br>(2020-Jan-17) | (2020-Jan-17)-<br>(2020-Aug-31)  | 375            | 131             | 0            |
| 4mos  | <b>DTaP-IPV-Hib</b> (Diphtheria, Tetanus, Pertussis, Polio, Haemophilus influenzae type b) | (2018-Jan-01)-<br>(2019-Nov-17) | (2019-Nov-17)-<br>(2020-June-30) | 348            | 124             | 34           |
|       | <b>Pneu-C-13</b> (Pneumococcal Conjugate 13)                                               | (2018-Jan-01)-<br>(2019-Nov-17) | (2019-Nov-17)-<br>(2020-June-30) | 348            | 124             | 34           |
| 6mos  | <b>DTaP-IPV-Hib</b> (Diphtheria, Tetanus, Pertussis, Polio, Haemophilus influenzae type b) | (2018-Jan-01)-<br>(2019-Sep-17) | (2019-Sep-17)-<br>(2020-Apr-30)  | 315            | 121             | 70           |
| 12mos | <b>MMR</b> (Measles, Mumps, Rubella)                                                       | (2018-Jan-01)-<br>(2019-Mar-17) | (2019-Mar-17)-<br>(2019-Oct-31)  | 214            | 127             | 165          |
|       | <b>Pneu-C-13</b> (Pneumococcal Conjugate 13)                                               | (2018-Jan-01)-<br>(2019-Mar-17) | (2019-Mar-17)-<br>(2019-Oct-31)  | 214            | 127             | 165          |
|       | <b>Men-C-C</b> (Meningococcal Conjugate C)                                                 | (2018-Jan-01)-<br>(2019-Mar-17) | (2019-Mar-17)-<br>(2019-Oct-31)  | 214            | 127             | 165          |
| 15mos | <b>Var</b> (Varicella)                                                                     | (2018-Jan-01)-<br>(2018-Dec-17) | (2018-Dec-17)-<br>(2019-Jul-31)  | 175            | 99              | 232          |
| 18mos | <b>DTaP-IPV-Hib</b> (Diphtheria, Tetanus, Pertussis, Polio, Haemophilus influenzae type b) | (2018-Jan-01)-<br>(2018-Sep-17) | (2018-Sep-17)-<br>(2019-Apr-31)  | 129            | 104             | 273          |

## STATISTICAL ANALYSIS

We used descriptive statistics to characterize our study sample. We estimated the percentage of patients receiving 1) timely, 2) delayed or 3) no vaccination for each of the 10 routine vaccinations pre and post COVID-19. 95% confidence intervals are provided for each of the estimated percentages using the Clopper-Pearson method. Fisher's exact test was used to test whether the percentage of patients

1  
2  
3 receiving 1) timely, 2) delayed, or 3) no vaccination differs pre-vs-post COVID-19. We estimated median  
4 time to vaccination (and 95% CI) for each of the routine childhood vaccinations. Cumulative incidence  
5 functions were plotted and log-rank tests were used to examine differences in time to each of the 10  
6 routine childhood vaccinations, pre versus post COVID-19. A nominal  $\alpha = 0.05$  threshold was used for  
7 declaring statistical significance of hypothesis tests.  
8  
9  
10  
11  
12  
13  
14  
15  
16

#### 17 ETHICS APPROVAL

18 Ethics approval was received from the Research Ethics Board at Sinai Health.  
19  
20  
21  
22  
23  
24  
25  
26  
27  
28  
29  
30  
31  
32  
33  
34  
35  
36  
37  
38  
39  
40  
41  
42  
43  
44  
45  
46  
47  
48  
49  
50  
51  
52  
53  
54  
55  
56  
57  
58  
59  
60

Confidential

## RESULTS

The study included N=506 patients born between January 1, 2018 and August 31, 2020. The patient population was approximately balanced between males (52.4%) and females (47.6%). The average age of the included children as of November 30, 2020 was 18.5 months (median=17.7 months; IQR= 10.0 – 26.6). The oldest child was born January 1, 2018 and the youngest child was born August 29, 2020. The number of patients born in each study month is given in Appendix 2.

Table 2 illustrates the percentage of patients receiving 1) timely, 2) delayed, or 3) no vaccination pre-vs-post COVID-19. Median time to vaccination is presented in Table 3 (along with 95% CI). Cumulative incidence functions for each routine childhood vaccination, pre- vs post-COVID-19 are illustrated in Figure 1. For the early childhood vaccinations recommended at 2, 4 and 6 months of age, we observed few clinically meaningful differences in timeliness of vaccination, or up-to-date status pre-vs-post COVID-19. For the later vaccines administered at 12, 15, and 18 months, the results were suggestive of modest declines in timeliness of vaccination and up-to-date vaccination status in the post-COVID-19 period compared to the pre-COVID-19 period. Overall, at the end of the study period (November 30, 2020), 422/506 (83.4%) of patients were up to date for their required vaccinations.

Table 2: Percentage of patients receiving timely, delayed, and no immunization pre-vs-post COVID-19. 95% confidence intervals are displayed for each estimated percentage. Fisher's exact test is used to assess changes in vaccination uptake pre-vs-post COVID-19.

|                                                                                                    | Pre COVID-19                           |                                         |                                    | Post COVID-19                          |                                         |                                    | Fisher Exact Test P-Value |
|----------------------------------------------------------------------------------------------------|----------------------------------------|-----------------------------------------|------------------------------------|----------------------------------------|-----------------------------------------|------------------------------------|---------------------------|
|                                                                                                    | Percentage Vaccinated On-Time (95% CI) | Percentage Delayed Vaccination (95% CI) | Percentage Not Vaccinated (95% CI) | Percentage Vaccinated On-Time (95% CI) | Percentage Delayed Vaccination (95% CI) | Percentage Not Vaccinated (95% CI) |                           |
| <b>2mos DTaP-IPV-Hib</b><br>(Diphtheria, Tetanus, Pertussis, Polio, Haemophilus influenzae type b) | 94.67<br>(91.88 - 96.71)               | 3.73<br>(2.06 - 6.18)                   | 1.60<br>(0.59 - 3.45)              | 94.66<br>(89.30 - 97.82)               | 4.58<br>(1.70 - 9.70)                   | 0.76<br>(0.02 - 4.18)              | 0.7586                    |

|    |                                                                        |                 |                 |                |                 |                 |                 |
|----|------------------------------------------------------------------------|-----------------|-----------------|----------------|-----------------|-----------------|-----------------|
| 1  |                                                                        |                 |                 |                |                 |                 |                 |
| 2  |                                                                        |                 |                 |                |                 |                 |                 |
| 3  | <b>2mos Pneu-C-13</b>                                                  |                 |                 |                |                 |                 |                 |
| 4  | (Pneumococcal Conjugate 13)                                            |                 |                 |                |                 |                 |                 |
| 5  |                                                                        | 93.6            | 3.73            | 2.67           | 94.66           | 4.58            | 0.76            |
| 6  |                                                                        | (90.63 - 95.86) | (2.06 - 6.18)   | (1.29 - 4.85)  | (89.30 - 97.82) | (1.70 - 9.70)   | (0.02 - 4.18)   |
| 7  |                                                                        |                 |                 |                |                 |                 | 0.4511          |
| 8  | <b>4mos DTaP-IPV-Hib</b>                                               |                 |                 |                |                 |                 |                 |
| 9  | (Diphtheria, Tetanus, Pertussis, Polio, Haemophilus influenzae type b) |                 |                 |                |                 |                 |                 |
| 10 |                                                                        | 90.80           | 5.75            | 3.45           | 94.35           | 3.23            | 2.42            |
| 11 |                                                                        | (87.27 - 93.63) | (3.55 - 8.74)   | (1.79 - 5.95)  | (88.71 - 97.70) | (0.89 - 8.05)   | (0.50 - 6.91)   |
| 12 |                                                                        |                 |                 |                |                 |                 | 0.5374          |
| 13 | <b>4mos Pneu-C-13</b>                                                  |                 |                 |                |                 |                 |                 |
| 14 | (Pneumococcal Conjugate 13)                                            |                 |                 |                |                 |                 |                 |
| 15 |                                                                        | 91.09           | 5.46            | 3.45           | 92.74           | 4.03            | 3.23            |
| 16 |                                                                        | (87.59 - 93.87) | (3.32 - 8.40)   | (1.79 - 5.95)  | (86.67 - 96.63) | (1.32 - 9.16)   | (0.89 - 8.05)   |
| 17 |                                                                        |                 |                 |                |                 |                 | 0.9180          |
| 18 | <b>6mos DTaP-IPV-Hib</b>                                               |                 |                 |                |                 |                 |                 |
| 19 | (Diphtheria, Tetanus, Pertussis, Polio, Haemophilus influenzae type b) |                 |                 |                |                 |                 |                 |
| 20 |                                                                        | 88.89           | 6.03            | 5.08           | 81.82           | 9.09            | 9.09            |
| 21 |                                                                        | (84.89 - 92.14) | (3.67 - 9.26)   | (2.93 - 8.12)  | (73.78 - 88.24) | (4.63 - 15.68)  | (4.63 - 15.68)  |
| 22 |                                                                        |                 |                 |                |                 |                 | 0.1272          |
| 23 | <b>12mos MMR</b>                                                       |                 |                 |                |                 |                 |                 |
| 24 | (Measles, Mumps, Rubella)                                              |                 |                 |                |                 |                 |                 |
| 25 |                                                                        | 81.31           | 12.62           | 6.07           | 69.29           | 18.90           | 11.81           |
| 26 |                                                                        | (75.43 - 86.30) | (8.48 - 17.82)  | (3.27 - 10.16) | (60.49 - 77.17) | (12.50 - 26.80) | (6.76 - 18.73)  |
| 27 |                                                                        |                 |                 |                |                 |                 | 0.0321          |
| 28 | <b>12mos Pneu-C-13</b>                                                 |                 |                 |                |                 |                 |                 |
| 29 | (Pneumococcal Conjugate 13)                                            |                 |                 |                |                 |                 |                 |
| 30 |                                                                        | 79.44           | 10.75           | 9.81           | 68.50           | 18.90           | 12.60           |
| 31 |                                                                        | (73.40 - 84.65) | (6.94 - 15.69)  | (6.18 - 14.61) | (59.67 - 76.45) | (12.50 - 26.80) | (7.38 - 19.65)  |
| 32 |                                                                        |                 |                 |                |                 |                 | 0.0589          |
| 33 | <b>12mos Men-C-C</b>                                                   |                 |                 |                |                 |                 |                 |
| 34 | (Meningococcal Conjugate C)                                            |                 |                 |                |                 |                 |                 |
| 35 |                                                                        | 80.84           | 13.55           | 5.61           | 66.14           | 20.47           | 13.39           |
| 36 |                                                                        | (74.92 - 85.89) | (9.27 - 18.88)  | (2.93 - 9.59)  | (57.21 - 74.30) | (13.83 - 28.54) | (8.00 - 20.56)  |
| 37 |                                                                        |                 |                 |                |                 |                 | 0.0063          |
| 38 | <b>15mos Var</b>                                                       |                 |                 |                |                 |                 |                 |
| 39 | (Varicella)                                                            |                 |                 |                |                 |                 |                 |
| 40 |                                                                        | 64.00           | 24.57           | 11.43          | 52.53           | 24.24           | 23.23           |
| 41 |                                                                        | (56.41 - 71.10) | (18.39 - 31.64) | (7.12 - 17.10) | (42.24 - 62.66) | (16.19 - 33.89) | (15.33 - 32.79) |
| 42 |                                                                        |                 |                 |                |                 |                 | 0.0324          |
| 43 | <b>18mos DTaP-IPV-Hib</b>                                              |                 |                 |                |                 |                 |                 |
| 44 | (Diphtheria, Tetanus, Pertussis, Polio, Haemophilus influenzae type b) |                 |                 |                |                 |                 |                 |
| 45 |                                                                        | 66.67           | 17.83           | 15.50          | 58.65           | 24.04           | 17.31           |
| 46 |                                                                        | (57.83 - 74.72) | (11.65 - 25.54) | (9.73 - 22.92) | (48.58 - 68.23) | (16.20 - 33.41) | (10.59 - 25.97) |
| 47 |                                                                        |                 |                 |                |                 |                 | 0.4195          |
| 48 |                                                                        |                 |                 |                |                 |                 |                 |
| 49 |                                                                        |                 |                 |                |                 |                 |                 |
| 50 |                                                                        |                 |                 |                |                 |                 |                 |
| 51 |                                                                        |                 |                 |                |                 |                 |                 |
| 52 |                                                                        |                 |                 |                |                 |                 |                 |
| 53 |                                                                        |                 |                 |                |                 |                 |                 |
| 54 |                                                                        |                 |                 |                |                 |                 |                 |
| 55 |                                                                        |                 |                 |                |                 |                 |                 |
| 56 |                                                                        |                 |                 |                |                 |                 |                 |
| 57 |                                                                        |                 |                 |                |                 |                 |                 |
| 58 |                                                                        |                 |                 |                |                 |                 |                 |
| 59 |                                                                        |                 |                 |                |                 |                 |                 |
| 60 |                                                                        |                 |                 |                |                 |                 |                 |

Table 3 – Median time to vaccination (and 95% confidence interval) for each of the routine childhood vaccinations pre-vs-post the start of COVID-19. Log-rank test p-values are presented for testing differences in each of the routine childhood vaccination cumulative incidence functions pre-vs-post COVID-19.

|                                                                                                    | Pre COVID-19                    |                   |                            |                                               |                                               | Post COVID-19                   |                   |                            |                                               |                                               |                       |
|----------------------------------------------------------------------------------------------------|---------------------------------|-------------------|----------------------------|-----------------------------------------------|-----------------------------------------------|---------------------------------|-------------------|----------------------------|-----------------------------------------------|-----------------------------------------------|-----------------------|
|                                                                                                    | Number Eligible for Vaccination | Number Vaccinated | Median Time to Vaccination | Lower Limit 95% CI Median Time to Vaccination | Upper Limit 95% CI Median Time to Vaccination | Number Eligible for Vaccination | Number Vaccinated | Median Time to Vaccination | Lower Limit 95% CI Median Time to Vaccination | Upper Limit 95% CI Median Time to Vaccination | Log Rank Test P-value |
| <b>2mos DTaP-IPV-Hib</b><br>(Diphtheria, Tetanus, Pertussis, Polio, Haemophilus influenzae type b) | 375                             | 369               | 63                         | 63                                            | 64                                            | 131                             | 130               | 64                         | 63                                            | 65                                            | 1.000                 |
| <b>2mos Pneu-C-13</b><br>(Pneumococcal Conjugate 13)                                               | 374                             | 364               | 63                         | 63                                            | 64                                            | 131                             | 130               | 64                         | 63                                            | 65                                            | 0.900                 |
| <b>4mos DTaP-IPV-Hib</b><br>(Diphtheria, Tetanus, Pertussis, Polio, Haemophilus influenzae type b) | 342                             | 335               | 126                        | 126                                           | 128                                           | 122                             | 121               | 127                        | 125                                           | 129                                           | 0.400                 |
| <b>4mos Pneu-C-13</b><br>(Pneumococcal Conjugate 13)                                               | 338                             | 335               | 126                        | 126                                           | 127                                           | 122                             | 120               | 127                        | 125                                           | 129                                           | 0.700                 |
| <b>6mos DTaP-IPV-Hib</b><br>(Diphtheria, Tetanus, Pertussis, Polio, Haemophilus influenzae type b) | 303                             | 299               | 188                        | 188                                           | 189                                           | 118                             | 110               | 191                        | 189                                           | 195                                           | 0.007                 |
| <b>12mos MMR</b><br>(Measles, Mumps, Rubella)                                                      | 214                             | 201               | 372                        | 371                                           | 375                                           | 127                             | 112               | 374                        | 372                                           | 377                                           | 0.050                 |
| <b>12mos Pneu-C-13</b><br>(Pneumococcal Conjugate 13)                                              | 205                             | 193               | 374                        | 372                                           | 377                                           | 124                             | 111               | 375                        | 372                                           | 377                                           | 0.200                 |
| <b>12mos Men-C-C</b><br>(Meningococcal)                                                            | 214                             | 202               | 373                        | 372                                           | 377                                           | 127                             | 110               | 377                        | 374                                           | 381                                           | 0.007                 |



1  
2  
3  
4  
5  
6  
7  
8  
9  
10  
11  
12  
13  
14  
15  
16  
17  
18  
19  
20  
21  
22  
23  
24  
25  
26  
27  
28  
29  
30  
31  
32  
33  
34  
35  
36  
37  
38  
39  
40  
41  
42  
43  
44  
45  
46  
47  
48  
49  
50  
51  
52  
53  
54  
55  
56  
57  
58  
59  
60

|                                                                                                  |     |     |     |     |     |     |    |     |     |     |       |
|--------------------------------------------------------------------------------------------------|-----|-----|-----|-----|-----|-----|----|-----|-----|-----|-------|
| al Conjugate C)                                                                                  |     |     |     |     |     |     |    |     |     |     |       |
| <b>15mos Var (Varicella)</b>                                                                     | 175 | 155 | 471 | 466 | 477 | 99  | 76 | 478 | 470 | 526 | 0.040 |
| <b>18mos DTaP-IPV-Hib (Diphtheria, Tetanus, Pertussis, Polio, Haemophilus influenzae type b)</b> | 121 | 109 | 561 | 556 | 568 | 101 | 86 | 567 | 560 | 580 | 0.400 |

Confidential

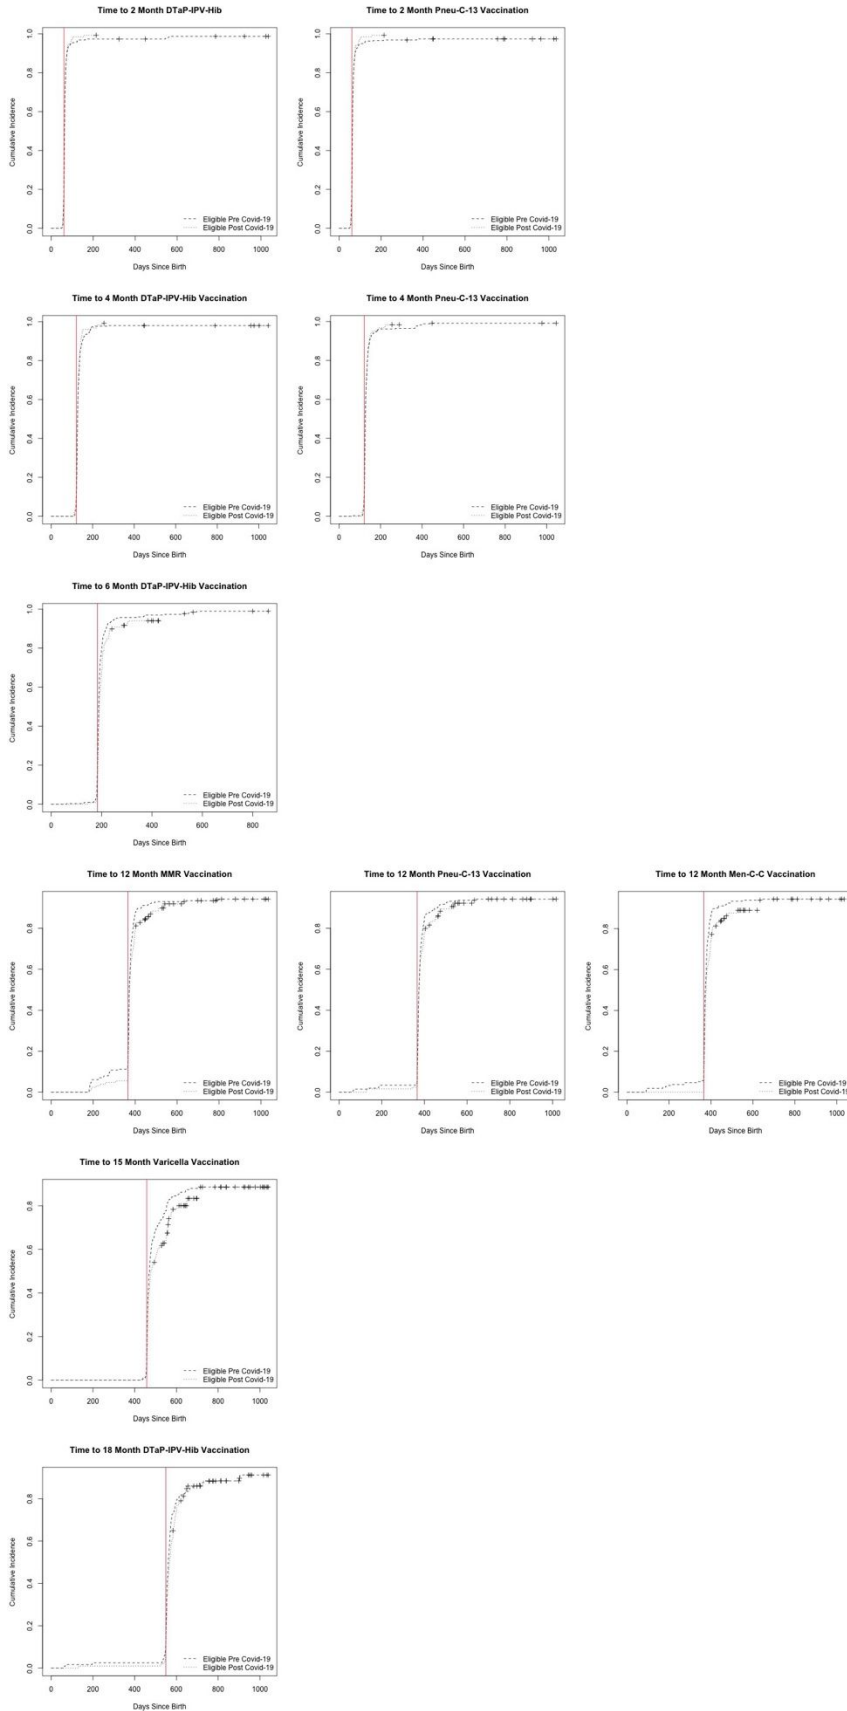

1  
2  
3  
4  
5  
6  
7  
8  
9  
10  
11  
12  
13  
14  
15  
16  
17  
18  
19  
20  
21  
22  
23  
24  
25  
26  
27  
28  
29  
30  
31  
32  
33  
34  
35  
36  
37  
38  
39  
40  
41  
42  
43  
44  
45  
46  
47  
48  
49  
50  
51  
52  
53  
54  
55  
56  
57  
58  
59  
60

Figure 1: Cumulative incidence functions for each of the 10 routine childhood vaccinations, pre-vs-post COVID-19. The dashed line represents vaccinations scheduled to fall in the pre-COVID-19 period; whereas, the dotted line indicates vaccinations scheduled to fall in the post-COVID-19 period. A vertical red line depicts the scheduled timing of each of the routine childhood vaccinations. The sub-plots in each of the six rows correspond to the 2-, 4-, 6-, 12-, 15-, and 18-month routine childhood vaccinations, respectively.

## DISCUSSION

COVID-19 poses threats to public health and health care systems worldwide, with governments implementing multi-faceted restrictions to curb the spread of COVID-19 and lessen the burden on health care systems (6). Although these mitigation strategies are important, concerns have been raised about their unintended consequences, such as the disruption to the provision of routine primary care, including vaccine delivery. Immunization against vaccine-preventable illness is a cornerstone of primary care in Ontario. Adherence to recommended vaccination schedules, irrespective of pandemic restrictions, was emphasized by several key organizations including the Canadian Pediatrics Society, the National Advisory Committee on Immunization, and Public Health Ontario (7–9). Ours is the first study to examine childhood vaccination data in the time of COVID-19 from an Ontario primary care perspective.

Our data suggested that vaccine completion rates were largely unchanged pre-and post the onset of COVID-19 restrictions for children in the first six months of life. However, we found that vaccine completion rates at the 12-month, 15-month and 18-month ages were modestly lower in the post pandemic period. We observed that even prior to the pandemic, there was attrition in vaccination rates in these older age groups, though this seemed to be amplified post-COVID-19. While it is reassuring that many children do eventually “catch up”, it may be clinically significant that there was an increase in the delayed vaccination rate (ranging from 5-15%) in the post COVID-19 period depending on the age group analyzed. In the event of an outbreak, these unvaccinated children may be at greater risk of morbidity from a vaccine-preventable illness (10).

1  
2  
3 The Public Health Agency of Canada (PHAC) routinely monitors childhood vaccination coverage in Canada  
4 through the childhood National Vaccination Coverage Survey (cNICS) and declares a national vaccination  
5 goal of 95% for each childhood vaccine (11). Our FHT vaccination rates seemed on par with cNICS's  
6 Ontario data for 2017 (11). Research from Alberta and Nova Scotia assessed timeliness of routine  
7 childhood vaccination and revealed that the 12 and 18 month vaccinations had the lowest proportion of  
8 children receiving timely doses (12,13). Our observations appeared to be consistent with these findings  
9 in both the pre-pandemic and post-pandemic periods.

10  
11  
12  
13  
14  
15  
16  
17  
18  
19  
20  
21  
22  
23  
24  
25  
26  
27  
28  
29  
30  
31  
32  
33  
34  
35  
36  
37  
38  
39  
40  
41  
42  
43  
44  
45  
46  
47  
48  
49  
50  
51  
52  
53  
54  
55  
56  
57  
58  
59  
60  
Reasons for incomplete vaccine coverage in children, prior to the COVID-19 pandemic have received much  
attention in the literature (14,15). Our study was not designed to probe into specific factors that may  
account for reductions in childhood vaccination rates. Rather, we aimed to present what we know as the  
first Canadian dataset reporting early childhood vaccination rates during COVID-19. The observation that  
the 12-to-18-month age group had less than ideal vaccination rates both prior to and during COVID-19,  
as well as increased delayed vaccinations post COVID-19 suggests that this group may represent a high  
yield target for improving overall vaccination rates.

Some jurisdictions have reported declining early childhood vaccination rates as a result of COVID-19 (4,5),  
with New York specifically noting a rebound in vaccination rates after a proactive effort to encourage  
vaccinations (16). The literature suggests a combination of service provision and service utilization factors  
affected vaccine uptake rates during the pandemic (17). *Service provision factors* include the disruption  
or suspension of programs, workforce shortages due to COVID-19 related redeployments, provider illness,  
inadequate supply of PPE or infection prevention and control, and supply chain disruptions of vaccines  
due to production or border restrictions (17). In our clinical setting, we were fortunately unaffected by  
these barriers and were uninterrupted in our ability to offer and prioritize in-person visits for early  
childhood vaccinations. Therefore, our clinical environment may have represented one of several local  
“best case scenarios.” This leads us to conclude that service utilization factors may have more of a

1  
2  
3 contributory role in our observed reduced vaccine uptake during the pandemic. By addressing *service*  
4 *utilization factors*, there may be ways to mitigate the potential of reduced vaccination rates in the context  
5  
6 of COVID-19 and perhaps to improve rates overall (17). We should continue to emphasize timely  
7  
8 vaccinations across all age groups. Given public fears of COVID-19 infection, and potential confusion  
9  
10 regarding evolving public health messages, clear and proactive education directed toward parents  
11  
12 becomes vital. Workflows that facilitate on time vaccinations can be implemented and may include the  
13  
14 flagging of missing vaccinations on the CPP and automated identification of these patients in the EMR for  
15  
16 call-back to book appointments.  
17  
18  
19  
20

21  
22 We recognize that our study, like many retrospective chart reviews, has limitations. First, the  
23  
24 inconsistency and potential for error during documentation in EMRs is well known (18). Clinicians have  
25  
26 different templates and systems in which they like to document, further increasing the heterogeneity and  
27  
28 difficulties in analyzing this type of data. At our two clinic sites, we mitigated this by enforcing a built-in  
29  
30 vaccination entry system to document all vaccinations with all care providers. Another limitation may be  
31  
32 the difficulty in establishing a clear division between COVID-19 and pre-COVID-19 as patients in family  
33  
34 medicine are under continuous rather than episodic care. This limitation may affect our attempts to  
35  
36 present a conclusive comparison between both time periods. Regardless, our intention with this study  
37  
38 was to report our clinic's vaccination trends during this time of flux.  
39  
40  
41

42  
43 This retrospective chart review shows the rate of vaccination during COVID-19 in two settings where  
44  
45 service-provision factors were not significantly changed; therefore, our data likely under-estimated the  
46  
47 effect of the COVID-19 pandemic on vaccination rates and may not be representative of the broader  
48  
49 context.  
50  
51

52  
53  
54  
55  
56 **CONCLUSION**  
57  
58  
59  
60

1  
2  
3 Our findings suggest that in our setting the COVID-19 pandemic has led to a modest deterioration in the  
4 uptake of routine childhood vaccines. Like the rest of Canada, our routine childhood vaccination rates  
5 are still suboptimal and its drivers are complicated even in non-pandemic circumstances. From our  
6 data, the lower rates in 12- to 18-month-old children represent a potentially high yield target for  
7 interventions. Improving vaccination rates will be important during COVID-19 as the potential of a  
8 developing cohort of children with less protection against vaccine-preventable illnesses could further  
9 burden an already strained public health system as Canada continues to fight against the transmission of  
10 COVID-19 and looks towards recovery.  
11  
12  
13  
14  
15  
16  
17  
18  
19  
20

## 21 REFERENCES

- 22 1. Orensteina WA, Ahmedb R. Simply put: Vaccination saves lives. *Proc Natl Acad Sci U S A*.  
23 2017;114(16):4031–3.
- 24 2. Office of the Premier of Ontario. Ontario Enacts Declaration of Emergency to Protect the Public  
25 [Internet]. 2020. Available from: [https://news.ontario.ca/en/release/56356/ontario-enacts-](https://news.ontario.ca/en/release/56356/ontario-enacts-declaration-of-emergency-to-protect-the-public)  
26 [declaration-of-emergency-to-protect-the-public](https://news.ontario.ca/en/release/56356/ontario-enacts-declaration-of-emergency-to-protect-the-public)
- 27 3. Canadian Institute for Health Information. How COVID-19 affected physician services [Internet].  
28 Vol. 53. 2020. Available from:  
29 <http://publications.lib.chalmers.se/records/fulltext/245180/245180.pdf><https://hdl.handle.net/20.500.12380/245180><http://dx.doi.org/10.1016/j.jsames.2011.03.003><https://doi.org/10.1016/j.gr.2017.08.001><http://dx.doi.org/10.1016/j.precamres.2014.12>
- 30 4. Bramer CA, Kimmins LM, Swanson R, Kuo J, Vranesich P, Jacques-Carroll LA, et al. Decline in Child  
31 Vaccination Coverage During the COVID-19 Pandemic — Michigan Care Improvement Registry,  
32 May 2016–May 2020. *MMWR Morb Mortal Wkly Rep*. 2020;69(20):630–1.
- 33 5. Bode SM, Gowda C, Mangini M, Kemper AR. COVID-19 and Primary Measles Vaccination Rates in  
34 a Large Primary Care Network. *Pediatrics*. 2021;147(1).
- 35 6. Tam T. Chief Public Health Officer of Canada’s Report on the State of Public Health in Canada  
36 2020. From risk to Resil An equity approach to COVID-19 [Internet]. 2020; Available from:  
37 [https://www.canada.ca/en/public-health/corporate/publications/chief-public-health-officer-](https://www.canada.ca/en/public-health/corporate/publications/chief-public-health-officer-reports-state-public-health-canada/from-risk-resilience-equity-approach-covid-19.html)  
38 [reports-state-public-health-canada/from-risk-resilience-equity-approach-covid-19.html](https://www.canada.ca/en/public-health/corporate/publications/chief-public-health-officer-reports-state-public-health-canada/from-risk-resilience-equity-approach-covid-19.html)
- 39 7. Canadian Paediatric Society. Stick to immunization schedule during the COVID-19 pandemic,  
40 paediatricians urge. 2020;53(9). Available from:  
41 <http://publications.lib.chalmers.se/records/fulltext/245180/245180.pdf><https://hdl.handle.net/20.500.12380/245180><http://dx.doi.org/10.1016/j.jsames.2011.03.003><https://doi.org/10.1016/j.gr.2017.08.001><http://dx.doi.org/10.1016/j.precamres.2014.12>
- 42 8. Ontario Ministry of Health. Guidance for immunization services during COVID-19. 2020; Available  
43  
44  
45  
46  
47  
48  
49  
50  
51  
52  
53  
54  
55  
56  
57  
58  
59  
60

- 1  
2  
3 from:  
4 [http://www.health.gov.on.ca/en/pro/programs/publichealth/coronavirus/docs/Immunization\\_S](http://www.health.gov.on.ca/en/pro/programs/publichealth/coronavirus/docs/Immunization_Services_during_COVID-19_08-26-2020.pdf)  
5 [ervices\\_during\\_COVID-19\\_08-26-2020.pdf](http://www.health.gov.on.ca/en/pro/programs/publichealth/coronavirus/docs/Immunization_Services_during_COVID-19_08-26-2020.pdf)  
6
- 7 9. National Advisory Committee of Vaccinations. Interim guidance on continuity of immunization  
8 programs during the COVID-19 pandemic [Internet]. 2020. Available from:  
9 [https://www.canada.ca/en/public-health/services/immunization/national-advisory-committee-](https://www.canada.ca/en/public-health/services/immunization/national-advisory-committee-on-immunization-naci/interim-guidance-immunization-programs-during-covid-19-pandemic.html)  
10 [on-immunization-naci/interim-guidance-immunization-programs-during-covid-19-pandemic.html](https://www.canada.ca/en/public-health/services/immunization/national-advisory-committee-on-immunization-naci/interim-guidance-immunization-programs-during-covid-19-pandemic.html)  
11
  - 12 10. Brown C. Measles resurgence comes to Canada. *CMAJ*. 2019;191(11):E319.  
13
  - 14 11. Public Health Agency of Canada. Vaccine Coverage in Canadian Children: Results from the 2017  
15 Childhood National Immunization Coverage Survey (cNICS) [Internet]. Available from:  
16 [https://www.canada.ca/en/public-health/services/publications/healthy-living/2017-vaccine-](https://www.canada.ca/en/public-health/services/publications/healthy-living/2017-vaccine-uptake-canadian-children-survey.html#tbl2)  
17 [uptake-canadian-children-survey.html#tbl2](https://www.canada.ca/en/public-health/services/publications/healthy-living/2017-vaccine-uptake-canadian-children-survey.html#tbl2)  
18
  - 19 12. Saini V, MacDonald SE, McNeil DA, McDonald SW, Kellner JD, Edwards SA, et al. Timeliness and  
20 completeness of routine childhood vaccinations in children by two years of age in Alberta,  
21 Canada. *Can J Public Heal*. 2017;108(2):e124–8.  
22
  - 23 13. Dummer TJB, Cui Y, Strang R, Parker L. Immunization completeness of children under two years  
24 of age in Nova Scotia, Canada. *Can J Public Heal*. 2012;103(5):363–7.  
25
  - 26 14. Scheifele DW, Halperin SA, Bettinger JA. Childhood immunization rates in Canada are too low:  
27 UNICEF. *Paediatr Child Heal*. 2014;19(5):237–8.  
28
  - 29 15. MacDonald N. The long and winding road to improving immunization rates: Sharing best  
30 practices in Canada. *Canada Commun Dis Rep*. 2016;42(12):243–5.  
31
  - 32 16. Langdon-Embry M, Papadouka V, Cheng I, Almashhadani M, Ternier A, Zucker JR. Notes from the  
33 Field: Rebound in Routine Childhood Vaccine Administration Following Decline During the COVID-  
34 19 Pandemic — New York City, March 1–June 27, 2020 . *MMWR Morb Mortal Wkly Rep*.  
35 2020;69(30):999–1001.  
36
  - 37 17. Olorunsaiye CZ, Yusuf KK, Reinhart K, Salihu HM. COVID-19 and Child Vaccination: A Systematic  
38 Approach to Closing the Immunization Gap. *Int J Matern Child Heal AIDS*. 2020;9(3):381–5.  
39
  - 40 18. Cowie MR, Blomster JI, Curtis LH, Duclaux S, Ford I, Fritz F, et al. Electronic health records to  
41 facilitate clinical research. *Clin Res Cardiol*. 2017;106(1).  
42
  - 43 19. Ontario Ministry of Health. Publicly Funded Immunization Schedules for Ontario. 2021.  
44  
45  
46  
47  
48  
49  
50  
51  
52  
53  
54  
55  
56  
57  
58  
59  
60

1  
2  
3  
4  
5  
6  
7  
8  
9  
10  
11  
12  
13  
14  
15  
16  
17  
18  
19  
20  
21  
22  
23  
24  
25  
26  
27  
28  
29  
30  
31  
32  
33  
34  
35  
36  
37  
38  
39  
40  
41  
42  
43  
44  
45  
46  
47  
48  
49  
50  
51  
52  
53  
54  
55  
56  
57  
58  
59  
60

CONFLICTS OF INTEREST, FINANCIAL DISCLOSURES, GRANT FUNDING, etc.

No conflicts of interest to declare. No sources of funding.

Confidential



## Appendix 1: Ontario's Publicly Funded Immunization Schedules (19)

## Publicly Funded Immunization Schedules for Ontario – January 2021

Publicly funded vaccines may be provided only to eligible individuals and must be free of charge

| Routine Schedule: Children Starting Immunization in Infancy                             |     |          |          |          |                     |           |           |         |         |          |          |                         |                         |
|-----------------------------------------------------------------------------------------|-----|----------|----------|----------|---------------------|-----------|-----------|---------|---------|----------|----------|-------------------------|-------------------------|
| Vaccine                                                                                 | Age | 2 Months | 4 Months | 6 Months | 1 Year <sup>Ⓞ</sup> | 15 Months | 18 Months | 4 Years | Grade 7 | 14 Years | 24 Years | >34 Years <sup>*†</sup> | 65 Years                |
| DTaP-IPV-Hib<br>Diphtheria, Tetanus, Pertussis, Polio,<br>Haemophilus influenzae type b |     | ◆        | ◆        | ◆        |                     |           | ◆         |         |         |          |          |                         |                         |
| Pneu-C-13<br>Pneumococcal Conjugate 13                                                  |     | ◆        | ◆        |          | ◆                   |           |           |         |         |          |          |                         |                         |
| Rot-5<br>Rotavirus                                                                      |     | ▲        | ▲        | ▲        |                     |           |           |         |         |          |          |                         |                         |
| Men-C-C<br>Meningococcal Conjugate C                                                    |     |          |          |          | ◆                   |           |           |         |         |          |          |                         |                         |
| MMR<br>Measles, Mumps, Rubella                                                          |     |          |          |          | ■                   |           |           |         |         |          |          |                         |                         |
| Var<br>Varicella                                                                        |     |          |          |          |                     | ■         |           |         |         |          |          |                         |                         |
| MMRV<br>Measles, Mumps, Rubella, Varicella                                              |     |          |          |          |                     |           |           | ■       |         |          |          |                         |                         |
| Tdap-IPV<br>Tetanus, diphtheria, pertussis, Polio                                       |     |          |          |          |                     |           |           | ◆       |         |          |          |                         |                         |
| HB<br>Hepatitis B                                                                       |     |          |          |          |                     |           |           |         | ●       |          |          |                         |                         |
| Men-C-ACYW<br>Meningococcal Conjugate ACYW-135                                          |     |          |          |          |                     |           |           |         | ●       |          |          |                         |                         |
| HPV-9<br>Human Papillomavirus                                                           |     |          |          |          |                     |           |           |         | ●       |          |          |                         |                         |
| Tdap<br>Tetanus, diphtheria, pertussis                                                  |     |          |          |          |                     |           |           |         |         | ◆        | ◆        |                         |                         |
| Td (booster)<br>Tetanus, diphtheria                                                     |     |          |          |          |                     |           |           |         |         |          |          | ◆<br>Every 10<br>years  |                         |
| HZ<br>Herpes Zoster                                                                     |     |          |          |          |                     |           |           |         |         |          |          |                         | I                       |
| Pneu-P-23<br>Pneumococcal Polysaccharide 23                                             |     |          |          |          |                     |           |           |         |         |          |          |                         | ■                       |
| Inf<br>Influenza                                                                        |     |          |          |          |                     |           |           |         |         |          |          |                         | *Every year in the fall |

◆ - A single vaccine dose given by intramuscular injection  
 ■ - A single vaccine dose given by subcutaneous injection  
 ▲ - A single vaccine dose given by mouth  
 ● - Provided through school-based immunization programs. Men-C-ACYW is a single dose; HB is a 2 dose series (see Table 6); HPV-9 is a 2 dose series (see Table 10). Each vaccine dose is given by intramuscular injection  
 Ⓞ - Given no earlier than the 1<sup>st</sup> birthday, and prior to 16 months of age

\*† - Once a dose of Tdap is given in adulthood (24 years of age), adults should receive Td boosters every 10 years thereafter  
 I - HZ is a 2 dose series (see Table 12) given by intramuscular injection  
 \* - Children 6 months to 8 years of age who have not previously received a dose of influenza vaccine require 2 doses given 24 weeks apart. Children who have previously received ≥1 dose of influenza vaccine should receive 1 dose per season thereafter  
 Note: A different schedule and/or additional doses may be needed for high risk individuals (see Table 3) or if doses of a vaccine series are missed (see appropriate Tables 4-24)

## Appendix 2

Number of births in each month of the study. Number of vaccinations administered in each month, for each vaccination class.

| Month-Year | Number Births | Number DTaP-IPV-Hib | Number Pneu-C-13 | Number MMR | Number Men-C-C | Number Varicella | Total Number Vaccinations |
|------------|---------------|---------------------|------------------|------------|----------------|------------------|---------------------------|
| 18-Jan     | 16            | NA                  | NA               | NA         | NA             | NA               | 0                         |
| 18-Feb     | 14            | NA                  | NA               | NA         | NA             | NA               | 0                         |
| 18-Mar     | 13            | 13                  | 13               | 0          | 0              | 0                | 26                        |
| 18-Apr     | 20            | 13                  | 13               | 0          | 0              | 0                | 26                        |
| 18-May     | 14            | 25                  | 25               | 0          | 3              | 0                | 53                        |
| 18-Jun     | 16            | 28                  | 26               | 0          | 0              | 0                | 54                        |
| 18-Jul     | 13            | 38                  | 25               | 0          | 1              | 0                | 64                        |
| 18-Aug     | 14            | 47                  | 35               | 0          | 2              | 0                | 84                        |
| 18-Sep     | 16            | 31                  | 21               | 0          | 0              | 0                | 52                        |
| 18-Oct     | 20            | 49                  | 34               | 0          | 1              | 0                | 84                        |
| 18-Nov     | 12            | 45                  | 30               | 1          | 0              | 0                | 76                        |
| 18-Dec     | 12            | 45                  | 31               | 0          | 2              | 0                | 78                        |
| 19-Jan     | 16            | 37                  | 37               | 11         | 12             | 0                | 97                        |
| 19-Feb     | 12            | 51                  | 43               | 12         | 11             | 0                | 117                       |
| 19-Mar     | 13            | 43                  | 43               | 15         | 14             | 0                | 115                       |
| 19-Apr     | 12            | 41                  | 38               | 22         | 19             | 11               | 131                       |
| 19-May     | 13            | 48                  | 45               | 17         | 13             | 10               | 133                       |
| 19-Jun     | 16            | 37                  | 37               | 17         | 16             | 9                | 116                       |
| 19-Jul     | 12            | 48                  | 43               | 17         | 22             | 15               | 145                       |
| 19-Aug     | 25            | 43                  | 37               | 17         | 14             | 4                | 115                       |
| 19-Sep     | 23            | 54                  | 41               | 16         | 16             | 16               | 143                       |
| 19-Oct     | 19            | 67                  | 58               | 17         | 16             | 15               | 173                       |
| 19-Nov     | 13            | 53                  | 47               | 15         | 17             | 11               | 143                       |
| 19-Dec     | 10            | 62                  | 43               | 11         | 8              | 9                | 133                       |
| 20-Jan     | 15            | 75                  | 60               | 18         | 16             | 28               | 197                       |
| 20-Feb     | 19            | 60                  | 36               | 12         | 14             | 14               | 136                       |
| 20-Mar     | 16            | 52                  | 38               | 11         | 10             | 7                | 118                       |
| 20-Apr     | 22            | 59                  | 36               | 8          | 9              | 8                | 120                       |
| 20-May     | 21            | 52                  | 39               | 11         | 12             | 7                | 121                       |
| 20-Jun     | 15            | 64                  | 59               | 17         | 17             | 12               | 169                       |
| 20-Jul     | 18            | 69                  | 50               | 13         | 12             | 9                | 153                       |
| 20-Aug     | 16            | 62                  | 50               | 21         | 21             | 14               | 168                       |
| 20-Sep     | NA            | 76                  | 71               | 25         | 27             | 12               | 211                       |
| 20-Oct     | NA            | 65                  | 47               | 17         | 12             | 15               | 156                       |
| 20-Nov     | NA            | 50                  | 39               | 21         | 17             | 21               | 148                       |
